# Supplementary material for: Peripapillary Vascular Reactivity in Primary Open-Angle Glaucoma With High Myopia by Using Optical Coherence Tomography Angiography
Source: PubMed Central journal article supplement (PMC8971362; doi:10.3389/fmed.2022.850483), 2022-03-18
Supplement: Table_1.pdf [file Table_1.pdf]

## *Supplementary Material*

**Supplementary Table S1. Linear regression results of correlations between the ONH vasoreactivity and baseline variables that were significantly different in the two study groups**

|                     | Variable | Univariate |                |                       | Multivariate |                |
|---------------------|----------|------------|----------------|-----------------------|--------------|----------------|
|                     |          | $\beta$    | <i>P</i> Value | <i>R</i> <sup>2</sup> | $\beta$      | <i>P</i> Value |
| Absolute $\Delta^*$ |          |            |                |                       |              |                |
|                     | Age      | 0.07       | 0.010          | 0.13                  | 0.006        | 0.822          |
| Whole image         | SAP      | 0.04       | 0.055          | 0.08                  | 0.008        | 0.663          |
|                     | DAP      | 0.04       | 0.201          | 0.04                  | -0.001       | 0.693          |
|                     | MAP      | 0.05       | 0.104          | 0.06                  | -0.001       | 0.983          |
|                     | MOPP     | 0.06       | 0.109          | 0.06                  | 0.003        | 0.929          |
|                     |          |            |                |                       |              |                |
| Peripapillary       | Age      | 0.06       | 0.039          | 0.09                  | 0.001        | 0.970          |
|                     | SAP      | 0.02       | 0.252          | 0.03                  | -0.004       | 0.855          |
|                     | DAP      | 0.01       | 0.755          | 0.002                 | -0.04        | 0.220          |
|                     | MAP      | 0.02       | 0.478          | 0.01                  | -0.02        | 0.430          |
|                     | MOPP     | 0.03       | 0.439          | 0.01                  | -0.03        | 0.556          |
| Relative $\Delta^*$ |          |            |                |                       |              |                |
|                     | Age      | 0.16       | 0.010          | 0.13                  | 0.01         | 0.845          |
| Whole image         | SAP      | 0.09       | 0.056          | 0.08                  | 0.02         | 0.678          |
|                     | DAP      | 0.11       | 0.178          | 0.04                  | -0.02        | 0.750          |
|                     | MAP      | 0.12       | 0.097          | 0.06                  | 0.001        | 0.991          |
|                     | MOPP     | 0.15       | 0.145          | 0.05                  | -0.009       | 0.921          |
|                     |          |            |                |                       |              |                |
| Peripapillary       | Age      | 0.14       | 0.036          | 0.09                  | 0.005        | 0.945          |
|                     | SAP      | 0.06       | 0.267          | 0.03                  | -0.01        | 0.820          |
|                     | DAP      | 0.03       | 0.709          | 0.003                 | -0.09        | 0.249          |
|                     | MAP      | 0.05       | 0.466          | 0.01                  | -0.05        | 0.443          |
|                     | MOPP     | 0.06       | 0.556          | 0.008                 | -0.08        | 0.414          |

Multivariate models involve in each variable and axial length.

SAP, systolic arterial pressure; DAP, diastolic arterial pressure; MAP, mean arterial pressure; MOPP, mean ocular perfusion pressure

\* $\Delta$ : Vessel density difference between baseline and hyperoxia
